# Supplementary material for: Genetic assessment reveals no population substructure and divergent regional and sex-specific histories in the Chachapoyas from northeast Peru
Source: PLoS One. 2020 Dec 31;15(12):e0244497. doi: 10.1371/journal.pone.0244497 (PMC7774974; doi:10.1371/journal.pone.0244497)
Supplement: S13 Table — (XLSX) [file pone.0244497.s021.xlsx]

## Sheet: Summary
Run name	Among groups	Among populations within groups	Within populations	FCT	FSC	FST	p-value (FCT)	p-value (FSC)	p-value (FST)
11_Y.arp	-3.28	6.97	96.30	-0.03279	0.06753	0.03696	0.93353+-0.00665	0.02053+-0.00533	0.00000+-0.00000
13_Y.arp	10.40	1.43	88.17	0.10402	0.01598	0.11834	0.00293+-0.00164	0.14956+-0.01412	0.00000+-0.00000
6_mito.arp	8.34	2.36	89.30	0.08338	0.02573	0.10697	0.04203+-0.00639	0.01857+-0.00414	0.00000+-0.00000
11_mito.arp	0.67	2.00	97.33	0.00674	0.02012	0.02672	0.60508+-0.01517	0.15249+-0.00894	0.01173+-0.00335
13_mito.arp	7.21	1.68	91.10	0.07214	0.01813	0.08896	0.00000+-0.00000	0.05181+-0.00583	0.00000+-0.00000
7_autos.arp	0.12	0.33	99.55	0.00120	0.00329	0.00449	0.15347+-0.01150	0.00196+-0.00136	0.00000+-0.00000
11_autos.arp	-0.33	0.76	99.57	-0.00327	0.00758	0.00434	0.67058+-0.01485	0.06354+-0.00649	0.00000+-0.00000
11_Y.arp	Grouping
Chachapoya	1
Chillao	2
Corobamba	3
Rodriguez de Mendoza	4
Leymebamba	5
La Jalca	5
13_Y.arp
Chachapoya	1
Chillao	1
Leymebamba	1
Rodriguez de Mendoza	1
La Jalca	2
Pomacochas	3
Jivaro	4
Huancas	5
Cajamarca	6
6_mito.arp
Chachapoya	1
Chillao	1
Corobamba	1
La Jalca	1
Leymebamba	1
Rodriguez de Mendoza	1
Jivaro	2
Pomacochas	2
11_mito.arp
Corobamba	1
Rodriguez de Mendoza	2
Chachapoyas	3
Chillao	4
Leymebamba	5
La Jalca	5
13_mito.arp
Chachapoya	1
Chillao	1
Corobamba	1
La Jalca	1
Leymebamba	1
Jivaro	2
Pomacochas	2
Rodriguez de Mendoza	3
Huancas	4
Cajamarca	5
7_autos.arp
Chachapoya	1
Chillao	1
Corobamba	1
La Jalca	1
Leymebamba	1
Jivaro	2
Pomacochas	2
Rodriguez de Mendoza	2
11_autos.arp
Corobamba	1
Rodriguez de Mendoza	2
Chachapoyas	3
Chillao	4
Leymebamba	5
La Jalca	5
